# Supplementary material for: Fusarium Keratitis—Review of Current Treatment Possibilities
Source: MDPI journal article supplement (doi:10.3390/jcm10235468), 2021-11-23

## Supplementary materials

### Search strategy overview

#### PubMed

((("fusarium"[MeSH Terms] OR "fusarium"[All Fields]) AND ("keratitis"[MeSH Terms] OR "keratitis"[All Fields])) OR ((("fusarium"[MeSH Terms] OR "fusarium"[All Fields]) AND keratomycosis[All Fields])) OR (mycotic[All Fields] AND ("keratitis"[MeSH Terms] OR "keratitis"[All Fields]))) OR (("microbiology"[MeSH Terms] OR "microbiology"[All Fields] OR "fungal"[All Fields] OR "fungi"[MeSH Terms] OR "fungi"[All Fields]) AND ("keratitis"[MeSH Terms] OR "keratitis"[All Fields]))

Number of results: 9 568

#### Embase (Elsevier)

'fusarium keratitis'/exp OR 'fusarium keratitis' OR 'keratomycosis'/exp OR keratomycosis OR 'mycotic keratitis'/exp OR 'mycotic keratitis' OR (mycotic AND ('keratitis'/exp OR keratitis)) OR 'fungal keratitis'/exp OR 'fungal keratitis' OR (fungal AND ('keratitis'/exp OR keratitis))

Number of results: 4 154

#### Cochrane CENTRAL

ID      Search

#1      (Fusarium keratitis):ti,ab,kw OR (Fusarium sp): ti,ab,kw

#2      (fungal keratitis):ti,ab,kw OR (corneal inflammation):ti,ab,kw OR ("open angle glaukeratitisoma"): ti,ab,kw

#3      (fusarium keratomycosis): ti,ab,kw OR (Fusarium sp): ti,ab,kw

#4      (mycotic keratitis): ti,ab,kw OR (Fusarium sp): ti,ab,kw

Number of results: 28, 128, 16 and 35 respectively for #1<sup>st</sup>, #2<sup>nd</sup>, 3<sup>rd</sup> and 4<sup>th</sup> search modalities

In the Cochrane Database we also find 1 systematic review and 123 Clinical Trials protocols

#### Web of Science

fusarium keratitis (All Fields) or fusarium keratomycosis (All Fields) or fungal keratitis (All Fields) or mycotic keratitis (All Fields)

Refined by: DOCUMENT TYPES: ( ARTICLE )

Number of results: 2 956

#### SCOPUS

( TITLE-ABS-KEY ( fungal AND keratitis ) OR TITLE-ABS-KEY ( fusarium AND keratitis ) OR TITLE-ABS-KEY ( fusarium AND keratomycosis ) OR TITLE-ABS-KEY ( mycotic AND keratitis ) )

Number of results: 3 538

## **Supplementary materials**

Additionally we searched the Clinical Trials registers websites available via institutional access of Wrocław Medical University

Additionally we concluded the possible source to be from previous systematic reviews and meta-analysis studies we found 328 studies for this criterion.

### **PICO statement :**

- 1) Patient: Included only patients that have been diagnosed with *Fusarium* keratitis with microbiologic confirmation.
- 2) Intervention: All types of medication were included from topical, through intracameral to systemic therapy.
- 3) Comparison: We intend to compare each possible treatment strategy to reveal the most applicable and find if there is any “special situations” that require further concern and change of standard procedure approach.
- 4) Outcome: Treatment that has been successful in the early and late stage of *Fusarium* keratitis in either reduction of rate of enucleation or corneal transplant; or in improvement of best-corrected visual acuity after the recovery. An additional factor primarily intended were reduction of hospitalisation time and/or close careful ophthalmologic care (some Departments prefer the outpatient “each day close follow-up” strategy) but due to the scarce resources this was only mentioned in the review.

## Supplementary materials

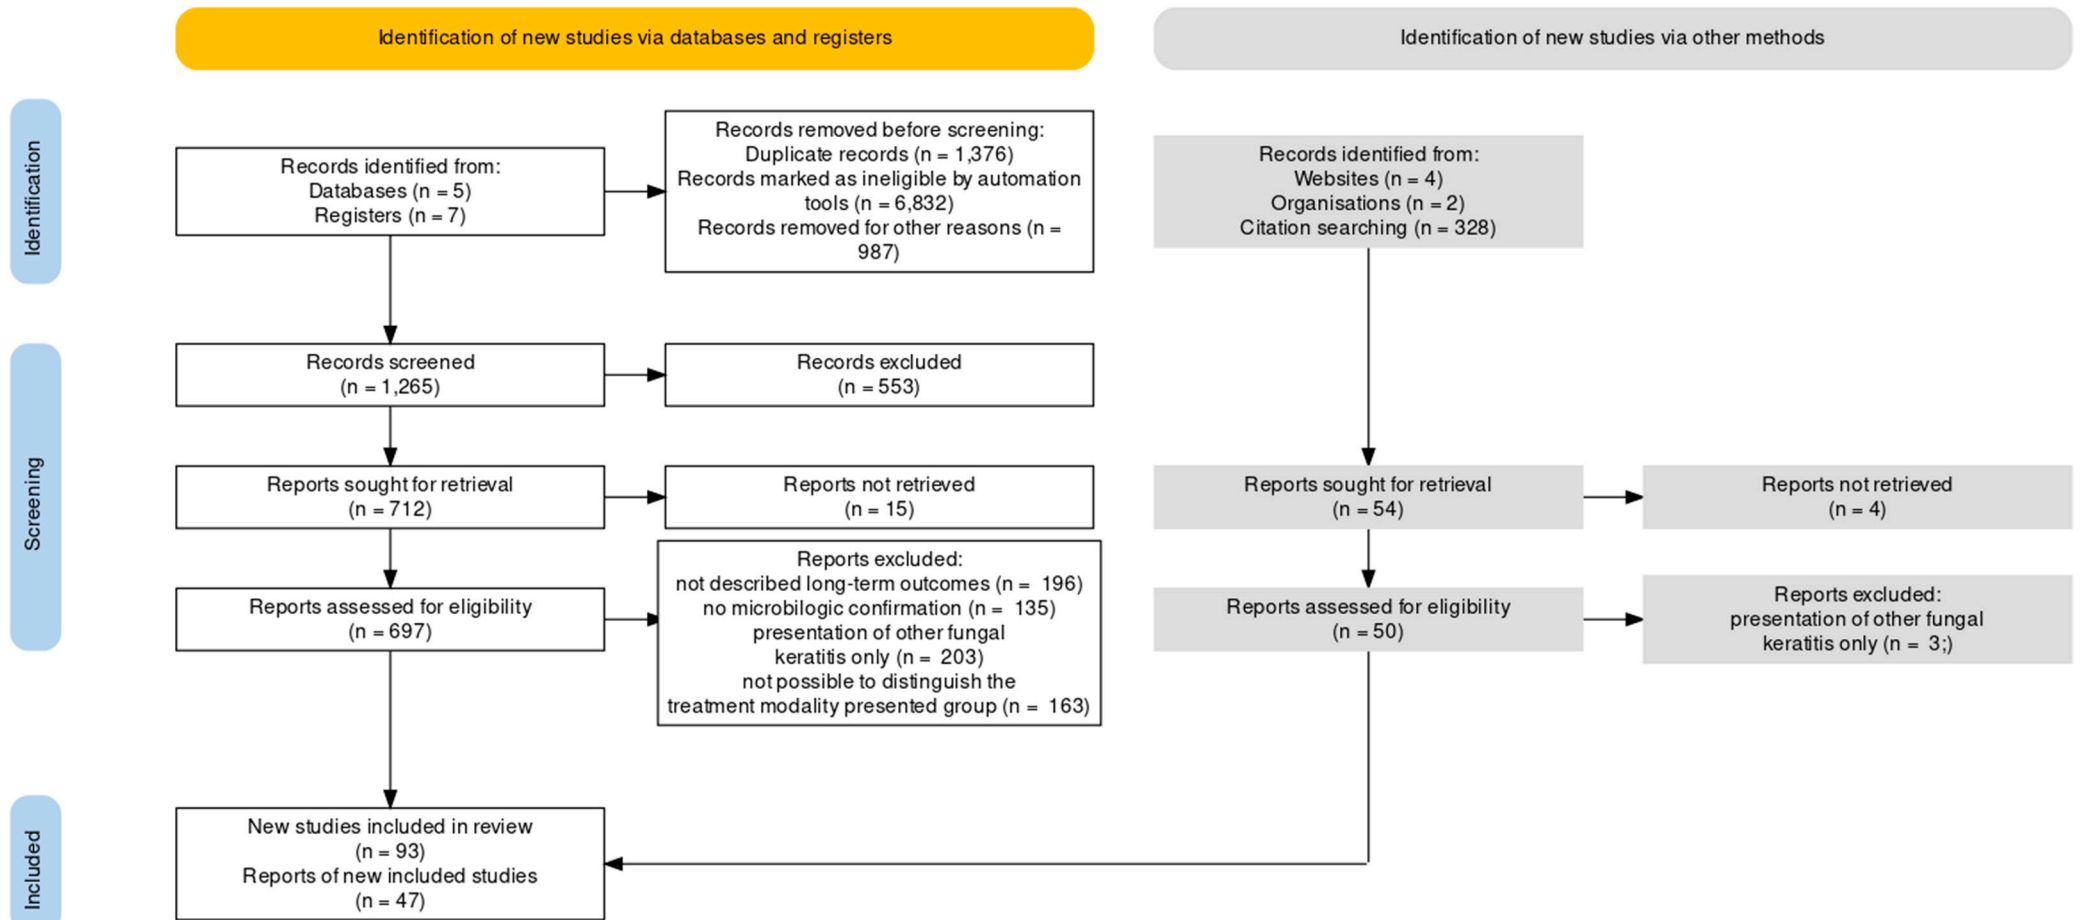

Supplement: s1 [file s1]
